# Supplementary material
Source: PubMed Central journal article supplement (PMC3083189)
Supplement: supp_M110.213579_Fig1.pdf [file supp_M110.213579_Fig1.pdf]

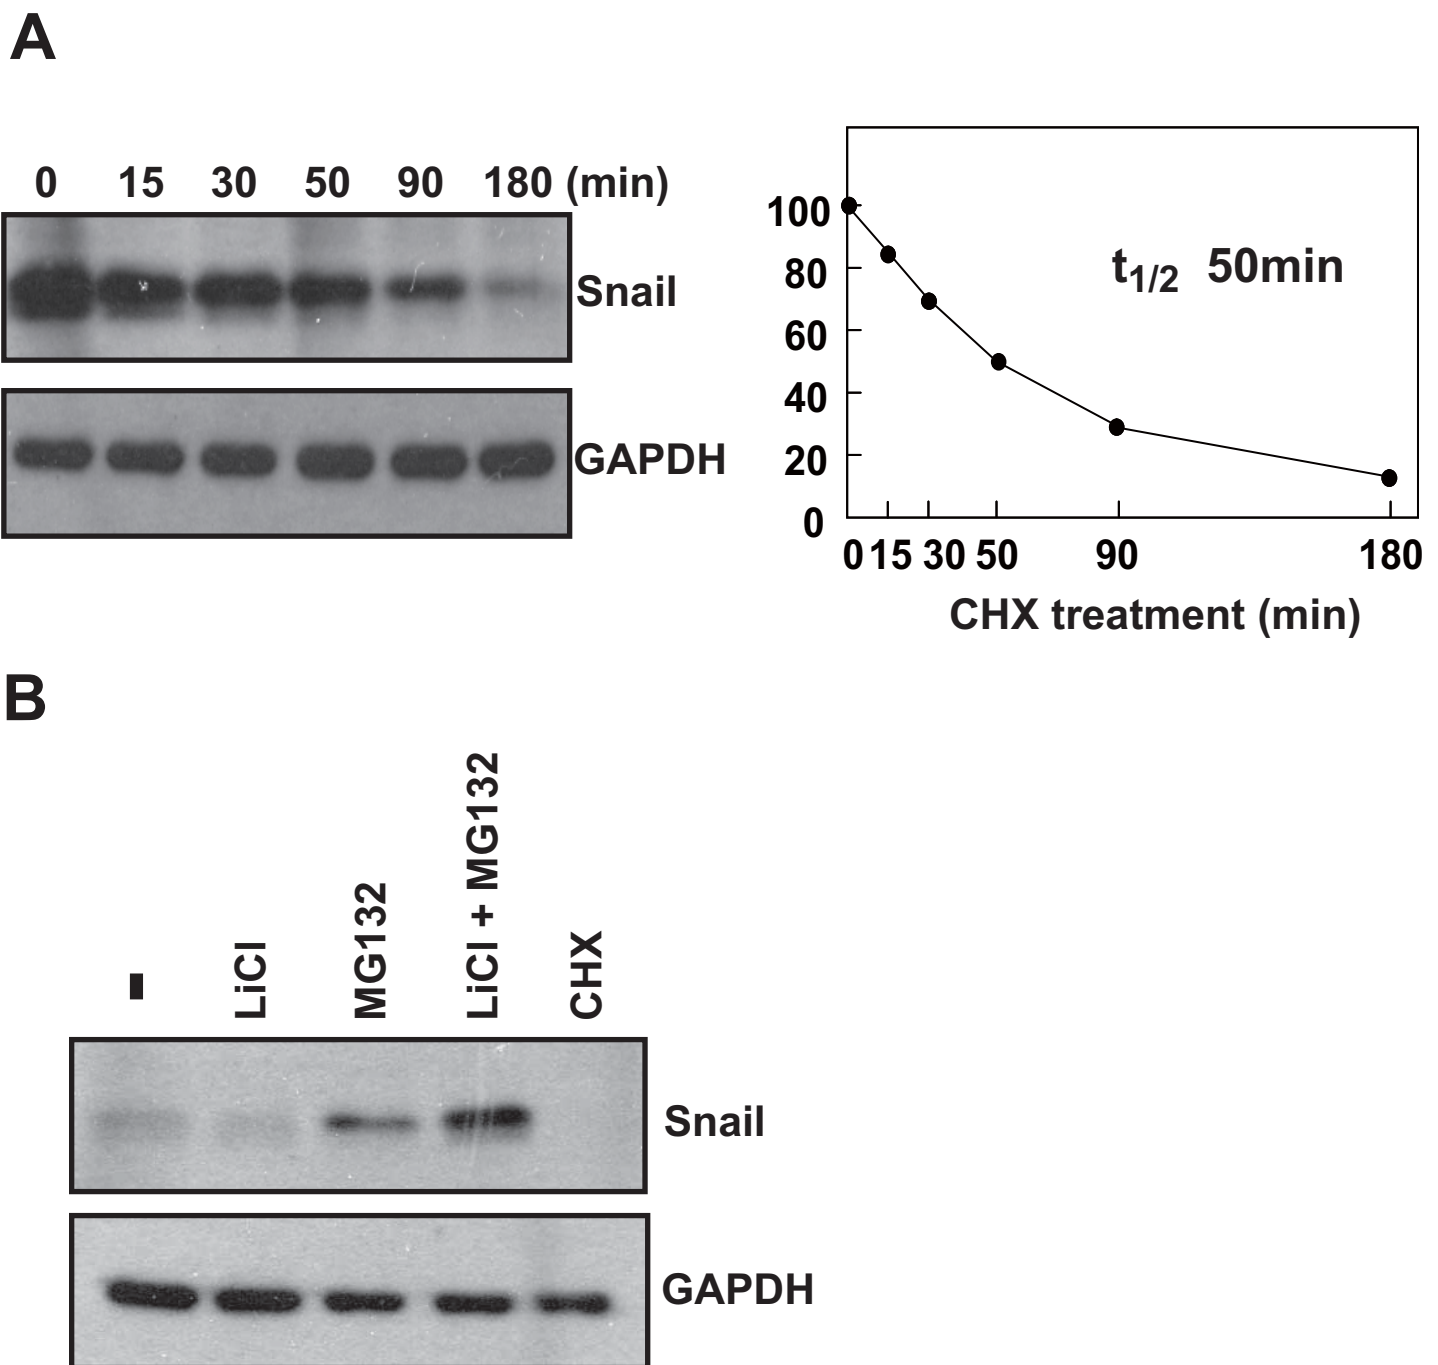

**Figure S1. The proteasome system destabilizes Snail protein in A549 cells.**

**A.** The half-life of endogenous Snail protein in A549 cells. Cells were treated with cycloheximide (CHX: 60  $\mu$ M) for the indicated time. Whole-cell extracts were analyzed by western blotting using anti-Snail or anti-GAPDH antibodies. **B.** A549 cells were treated with LiCl (20 mM), MG132 (10  $\mu$ M) or CHX (60  $\mu$ M) for 6h. A small amount of whole-cell extract was analyzed by western blotting as in A.
