# Supplementary material
Source: PubMed Central journal article supplement (PMC3083189)
Supplement: supp_M110.213579_Fig2.pdf [file supp_M110.213579_Fig2.pdf]

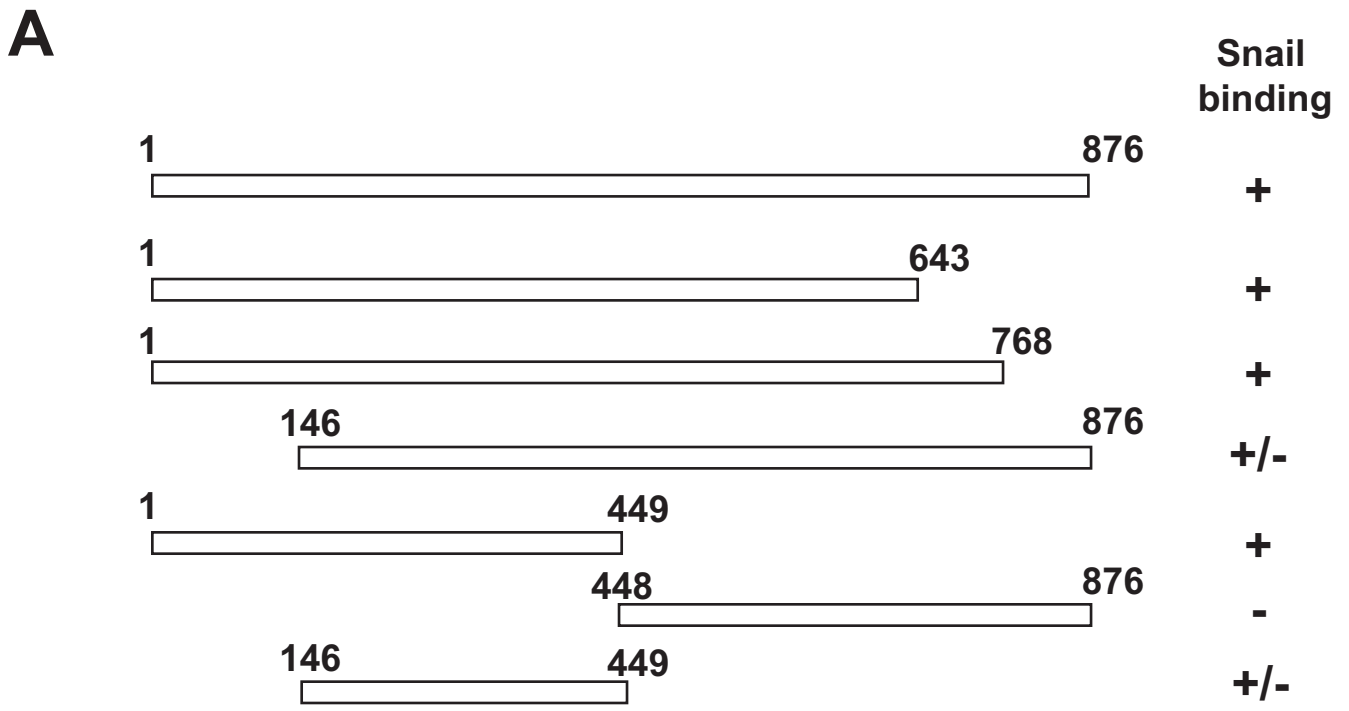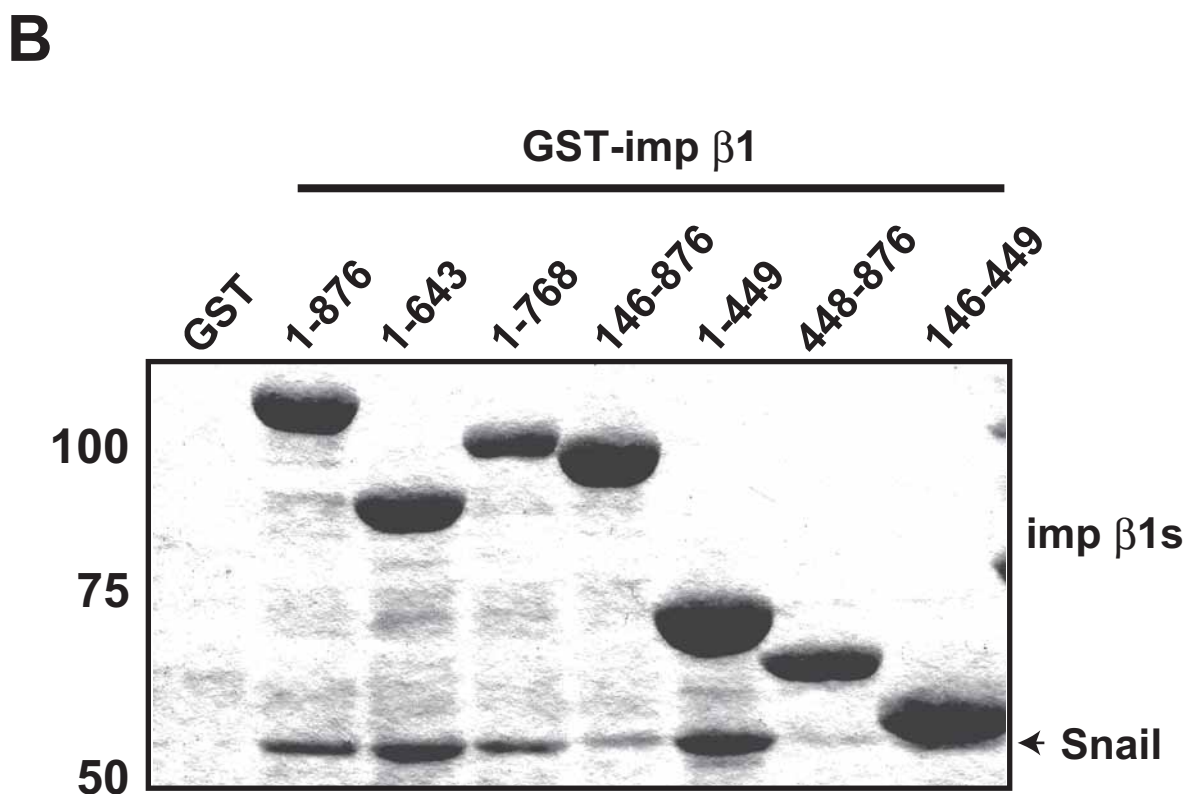

**Figure S2. The Snail-binding region of importin  $\beta$ 1.**

**A.** Schematic representation of truncated importin  $\beta$ 1 mutants used in this experiment.

**B.** Purified full-length and truncated GST-importin  $\beta$ 1s were incubated with Snail-GFP at 4°C for 2 h in the presence of Glutathione Sepharose. After extensive washing, bound proteins were subjected to SDS-PAGE and stained by CBB.
