# Supplementary material
Source: PubMed Central journal article supplement (PMC3083189)
Supplement: supp_M110.213579_Fig3.pdf [file supp_M110.213579_Fig3.pdf]

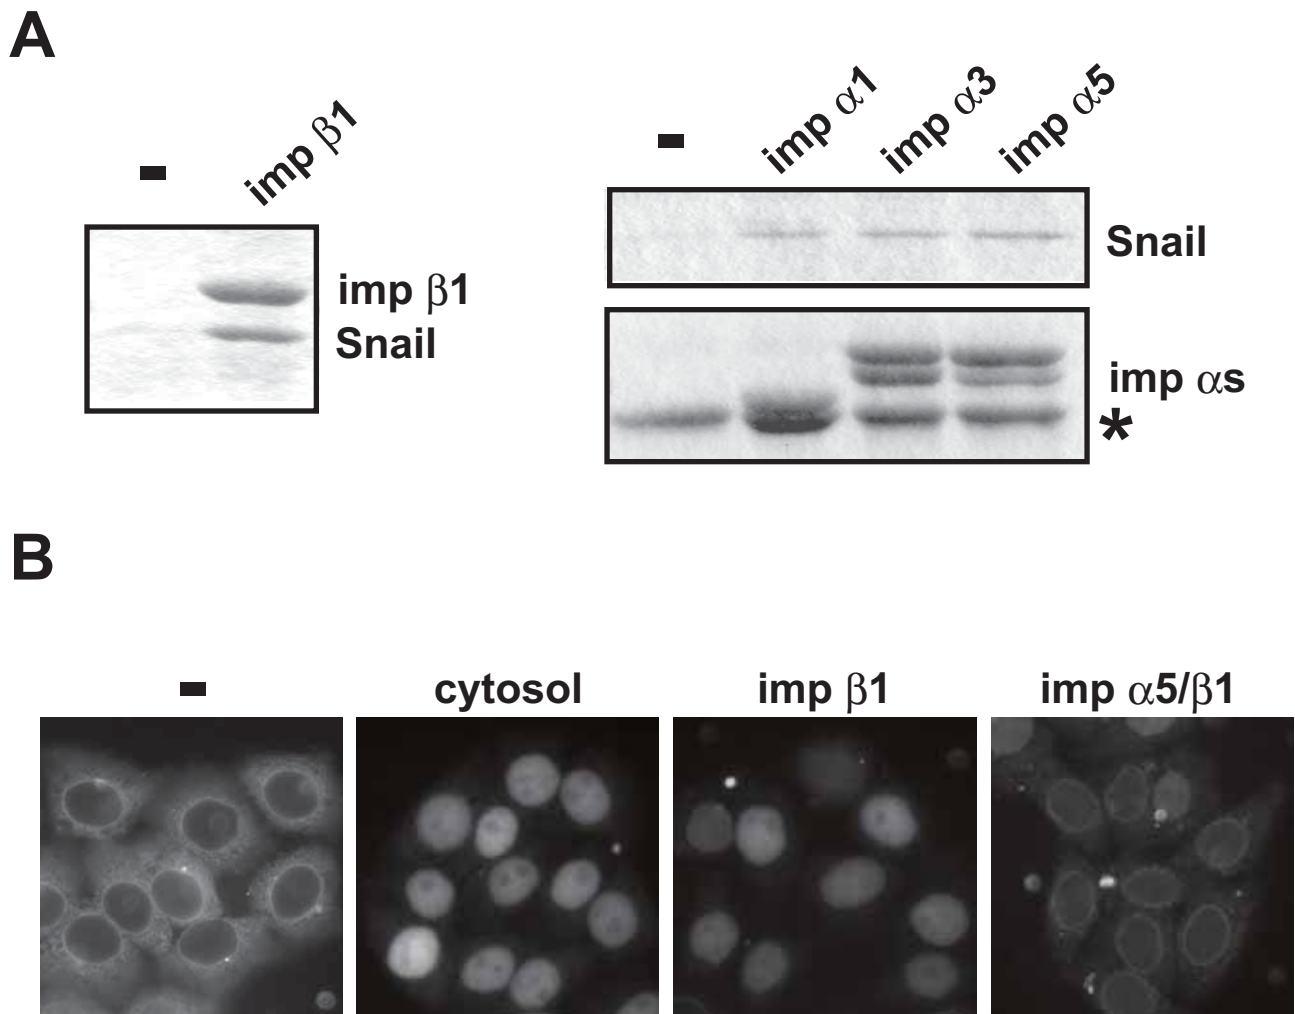

**Figure S3. Nuclear import of GST-GFP-Snail is inhibited by importin  $\alpha$ .**

**A.** GST-GFP-Snail associates with importin  $\beta$ 1 and importin  $\alpha$ s. GST-GFP-Snail was incubated with HA-importin  $\beta$ 1 or Flag-importin  $\alpha$ s in the presence of anti-HA agarose or anti-Flag agarose. The asterisk indicates the position of the heavy chain. **B.** *In vitro* nuclear transport assay. Purified importin  $\beta$ 1, Ran and NTF2, with or without importin  $\alpha$ , were applied to permeabilized HeLa cells and incubated at 30°C for 30 min.
